# Supplementary material
Source: Research Square preprint supplement (doi:10.21203/rs.3.rs-9867432/v1)
Supplement: Supplementary file 2 [file 526a1a742c6e4cc2e2b4c810.docx]

**SF1: Table: - Distribution of cancer types by sex among patients attending the oncology unit at ACSH, Tigray, Ethiopia (September 2017 – September 2025)**

| Major category / Cancer type | Female (n=2,671) n (%) | Male (n=1,558) n (%) | Total (N=4,229) n (%) |
| --- | --- | --- | --- |
| Hematologic and lymphoid neoplasms | 442 (16.55) | 782 (50.19) | 1,224 (28.94) |
| - Acute Lymphoblastic Leukemia (ALL) | 1 (0.04) | 8 (0.51) | 9 (0.21) |
| - Acute Myeloid Leukemia (AML) | 3 (0.11) | 5 (0.32) | 8 (0.19) |
| - Chronic Myeloid Leukemia (CML) | 141 (5.28) | 229 (14.70) | 370 (8.75) |
| - Hodgkin Lymphoma (HL) | 45 (1.68) | 75 (4.81) | 120 (2.84) |
| - Non-Hodgkin Lymphoma (NHL) | 97 (3.63) | 195 (12.52) | 292 (6.90) |
| - Multiple Myeloma (MM) | 25 (0.94) | 40 (2.57) | 65 (1.54) |
| - Myeloproliferative Neoplasm (MPN) | 45 (1.68) | 56 (3.59) | 101 (2.39) |
| - SLL/CLL | 85 (3.18) | 174 (11.17) | 259 (6.12) |
| Female genital organs | 1,146 (42.91) |  | 1,146 (27.10) |
| - Cervical cancer | 520 (19.47) | — | 520 (12.30) |
| - Ovarian cancer | 294 (11.01) |  | 294 (6.95) |
| - Endometrial cancer | 37 (1.39) | — | 37 (0.87) |
| - Vaginal cancer | 6 (0.22) | — | 6 (0.14) |
| - Vulvar cancer | 53 (1.98) | — | 53 (1.25) |
| - Gestational trophoblastic disease (GTD) | 236 (8.84) | — | 236 (5.58) |
| Digestive system | 340 (12.73) | 345 (22.14) | 685 (16.20) |
| - Colorectal cancer | 153 (5.73) | 163 (10.46) | 316 (7.47) |
| - Gastric cancer | 52 (1.95) | 63 (4.04) | 115 (2.72) |
| - Hepatocellular Carcinoma (HCC) | 22 (0.82) | 44 (2.82) | 66 (1.56) |
| - Biliary tract cancer | 43 (1.61) | 21 (1.35) | 64 (1.51) |
| - Esophageal cancer | 31 (1.16) | 18 (1.16) | 49 (1.16) |
| - Pancreatic cancer | 17 (0.64) | 16 (1.03) | 33 (0.78) |
| - Anal cancer | 17 (0.64) | 12 (0.77) | 29 (0.69) |
| - Small bowel cancer | 5 (0.19) | 2 (0.13) | 7 (0.17) |
| - Appendiceal cancer | 0 (0.00) | 6 (0.39) | 6 (0.14) |
| Breast cancer | 487 (18.23) | 48 (3.08) | 535 (12.65) |
| Bone and soft tissue sarcomas | 68 (2.55) | 94 (6.03) | 162 (3.83) |
| - Soft tissue sarcoma (STS) | 57 (2.13) | 79 (5.07) | 136 (3.22) |
| - Osteosarcoma | 6 (0.22) | 7 (0.45) | 13 (0.31) |
| - Ewing sarcoma | 3 (0.11) | 5 (0.32) | 8 (0.19) |
| - Chondrosarcoma | 2 (0.07) | 3 (0.19) | 5 (0.12) |
| Head & Neck Cancer | 51 (1.91) | 85 (5.46) | 136 (3.22) |
| Respiratory & Intrathoracic | 38 (1.42) | 63 (4.04) | 101 (2.39) |
| - Lung Cancer | 37 (1.39) | 63 (4.04) | 100 (2.36) |
| - Thymoma | 1 (0.04) | 0 (0.00) | 1 (0.02) |
| Urinary Tract | 15 (0.56) | 25 (1.61) | 40 (0.95) |
| - Bladder Cancer | 13 (0.49) | 16 (1.03) | 29 (0.69) |
| - Renal Cell Carcinoma (RCC) | 2 (0.07) | 9 (0.58) | 11 (0.26) |
| Male Genital Organs | 0 (0.00) | 46 (2.95) | 46 (1.09) |
| - Testicular Cancer | — | 27 (1.73) | 27 (0.64) |
| - Prostate Cancer | — | 19 (1.22) | 19 (0.45) |
| Skin Cancer (non-sarcoma) | 24 (0.90) | 35 (2.25) | 59 (1.40) |
| Endocrine Glands | 34 (1.27) | 10 (0.64) | 44 (1.04) |
| - Thyroid Cancer | 34 (1.27) | 10 (0.64) | 44 (1.04) |
| Central Nervous System | 7 (0.26) | 3 (0.19) | 10 (0.24) |
| - Brain Tumor | 7 (0.26) | 3 (0.19) | 10 (0.24) |
| Other & Unspecified | 19 (0.71) | 21 (1.35) | 40 (0.95) |
| - Cancer of Unknown Primary (CUP) | 15 (0.56) | 18 (1.16) | 33 (0.78) |
| - Conjunctival Cancer | 3 (0.11) | 3 (0.19) | 6 (0.14) |
| - Kaposi Sarcoma | 1 (0.04) | 0 (0.00) | 1 (0.02) |
